# Supplementary material
Source: publisher figshare collection journal article supplement (https://acs.figshare.com/ndownloader/files/16353497)
Supplement: Supplementary file 1 [file 16353497]

## **Supporting Information**

### **Triggering of Low-Valence Molybdenum in Multiphasic MoS<sub>2</sub> for Effective Reactive Oxygen Species (ROS) Output in Catalytic Fenton-like Reactions**

Yu Chen,<sup>a, b, c</sup> Gong Zhang,<sup>b</sup> Qinghua Ji,<sup>b</sup> Huijuan Liu,<sup>b</sup> Jiuhui Qu<sup>a, b\*</sup>

<sup>a</sup> Key Laboratory of Drinking Water Science and Technology Research Centre for Eco-Environmental Sciences, Chinese Academy of Sciences, Beijing 100085, China.

<sup>b</sup> Center for Water and Ecology, State Key Joint Laboratory of Environment Simulation and Pollution Control, School of Environment, Tsinghua University, Beijing 100084, China

<sup>c</sup> University of Chinese Academy of Sciences, Beijing 100049, China

\*Corresponding Author: Email: [jhqu@rcees.ac.cn](mailto:jhqu@rcees.ac.cn)

**Text S1. The calculation method of Gibbs Free Energy.**

The structural optimization and transition states have been calculated using DMol3 code. The generalized gradient approximation (GGA) with the Perdew–Burke–Ernzerhof (PBE) functional and all-electron double numerical basis set with polarized function (DNP) have been employed. The convergence tolerance of energy, maximum force and maximum displacement are  $1.0 \times 10^{-5}$  Ha,  $2.0 \times 10^{-3}$  Ha/Å and  $5.0 \times 10^{-3}$  Å ( $1\text{Ha}=27.21\text{eV}$ ) for geometry optimization. The complete LST/QST search protocol, the SCF tolerance of  $1.0 \times 10^{-6}$  Ha and smearing of 0.005 Ha are set for transition states. The Grimme method for DFT-D correction is considered for all calculations. Each atom in the storage models is allowed to relax to the minimum in the enthalpy without any constraints.

Gibbs free energy change ( $\Delta G$ ) of each chemical reaction is calculated by:

$$\Delta G = \Delta E + \Delta ZPE - T\Delta S$$

where  $E$ ,  $ZPE$ ,  $T$  and  $S$  denote the calculated total energy, zero point energy, temperature and entropy, respectively.

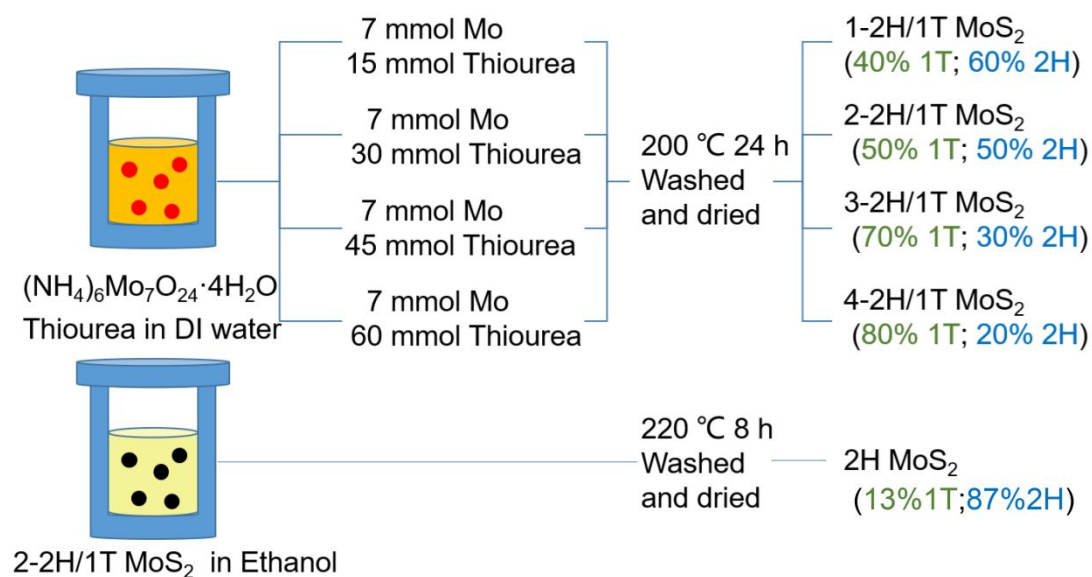

**Figure S1.** Schematic diagram of synthesizing  $\text{MoS}_2$ .  $\text{MoS}_2$  with various 1T phase concentration was synthesized by hydrothermal methods. **Chemicals:**  $(\text{NH}_4)_6\text{Mo}_7\text{O}_{24} \cdot 4\text{H}_2\text{O}$  and thiourea ( $\text{CH}_4\text{N}_2\text{S}$ ) were purchased from Aladdin Co. China. Nafion solutions (5% *wt*), 5,5-Dimethyl-1-pyrroline *N*-oxide (DMPO) and PMS ( $\text{KHSO}_5 \cdot 0.5\text{KHSO}_4 \cdot 0.5\text{K}_2\text{SO}_4$ ) were purchased from Sigma Aldrich Co. Ethanol (EtOH), *tert*-butyl alcohol (TBA) and *iso*-propyl alcohol (IPA) were purchased from Beijing J&K Co. Ltd., China.

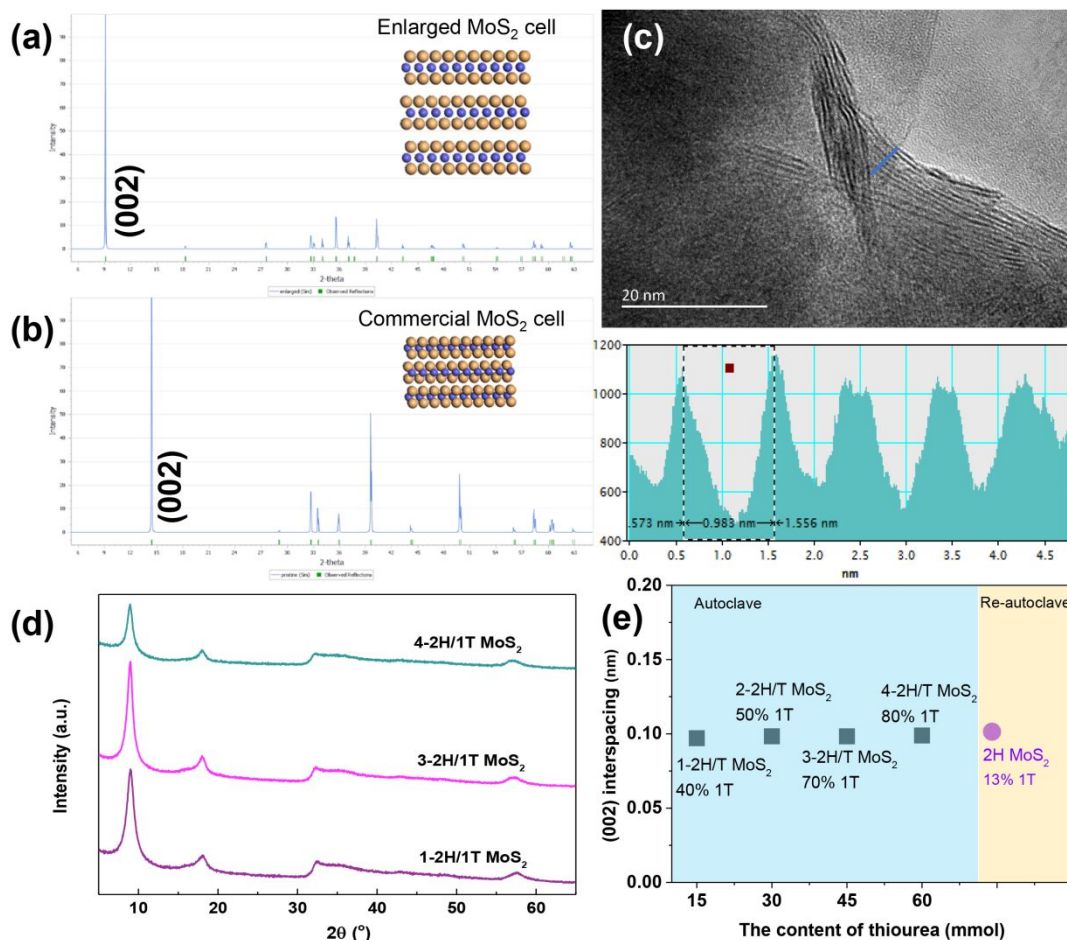

**Figure S2.** The XRD patterns of (a) enlarged MoS<sub>2</sub> cell and (b) pristine MoS<sub>2</sub> cell, (c) The cross-sectional TEM image and corresponding layer distance of 2-2H/1T MoS<sub>2</sub>, (d) XRD patterns of 1-2H/1T, 3-2H/1T and 4-2H/1T MoS<sub>2</sub>, (e) the relationship between concentration of thiourea and (002) interspacing.

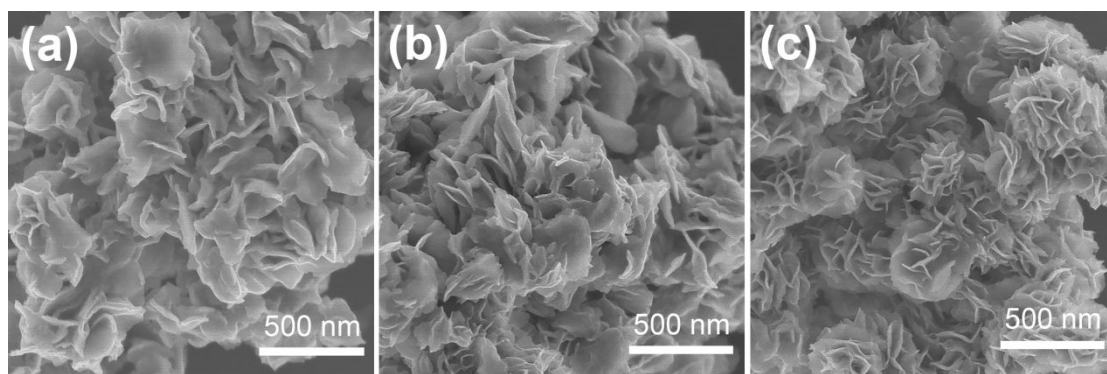

**Figure S3.** FESEM images of (a) 1-2H/1T MoS<sub>2</sub>, (b) 3-2H/1T MoS<sub>2</sub> and (c) 4-2H/1T MoS<sub>2</sub>.

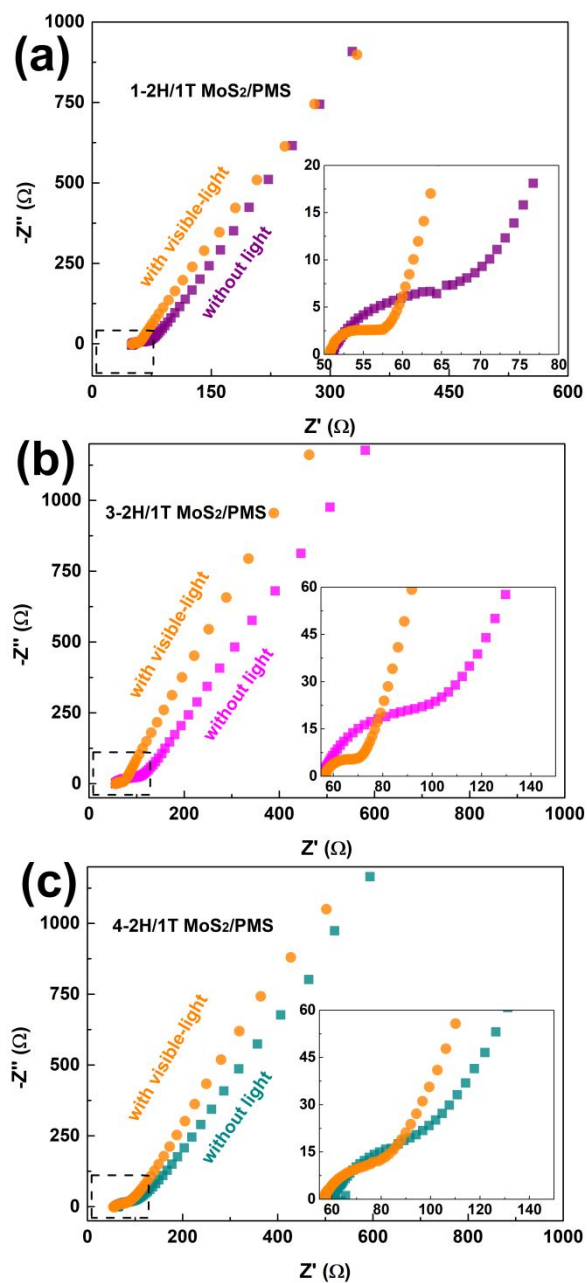

**Figure S4.** Nyquist plots of the (a) 1-2H/1T MoS<sub>2</sub>, (b) 3-2H/1T MoS<sub>2</sub> and (c) 4-2H/1T MoS<sub>2</sub> electrode measured in a solution of 0.5 mM PMS and 0.1 M NaSO<sub>4</sub> over the frequency range from  $10^5$  Hz to  $10^{-2}$  Hz. The inset shows the magnified EIS at high frequency.

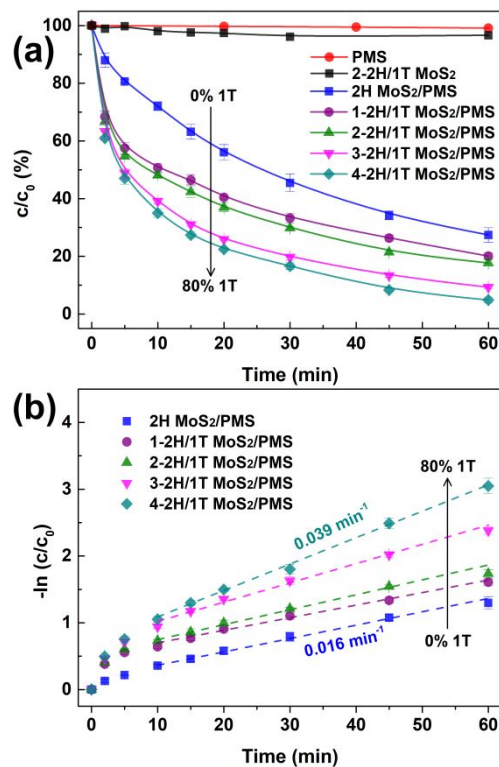

**Figure S5.** (a) Removal efficiency of 2,4-D using MoS<sub>2</sub> under activation of PMS, (b) pseudo-first-order kinetics regression in selected processes. Reaction conditions: [2,4-D]<sub>0</sub> = 25 μM; [PMS]<sub>0</sub> = 0.5 mM; Catalyst dosage = 100 mg·L<sup>-1</sup>, initial pH = 5.0, Temperature = 20 °C.

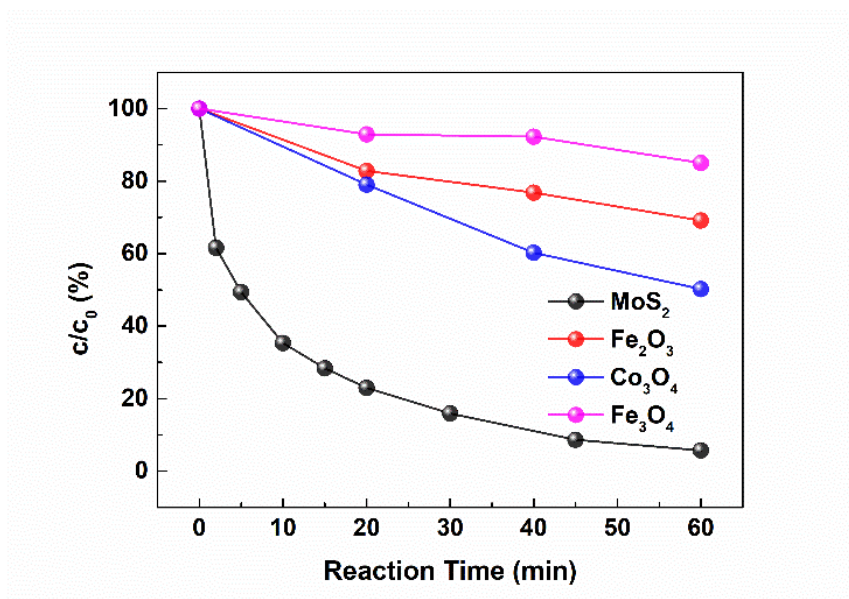

**Figure S6.** The evaluation of catalytic PMS performance using 4-2H/1T MoS<sub>2</sub> and benchmarks (Fe<sub>2</sub>O<sub>3</sub>, Fe<sub>3</sub>O<sub>4</sub>, Co<sub>3</sub>O<sub>4</sub>). The benchmarks were all purchased from Sino pharm Co. Ltd. Shanghai.



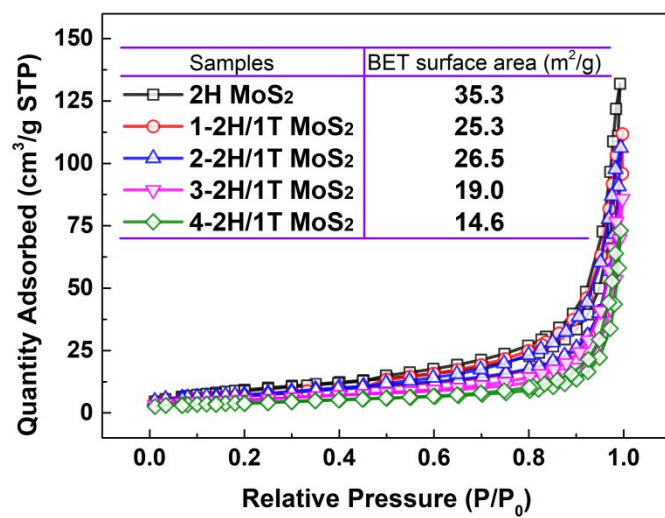

**Figure S7.** The BET surface area of 2H, 1-2H/1T, 2-2H/1T, 3-2H/1T and 4-2H/1T MoS<sub>2</sub> samples.

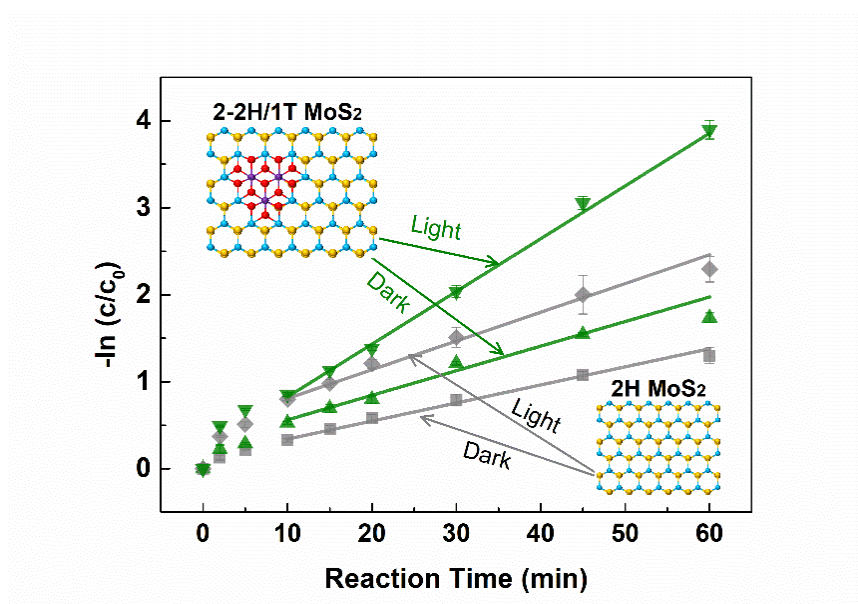

**Figure S8.** Pseudo-first-order kinetic fitting on 2,4-D degradation in 2H MoS<sub>2</sub>/PMS or 2-2H/1T MoS<sub>2</sub>/PMS system.

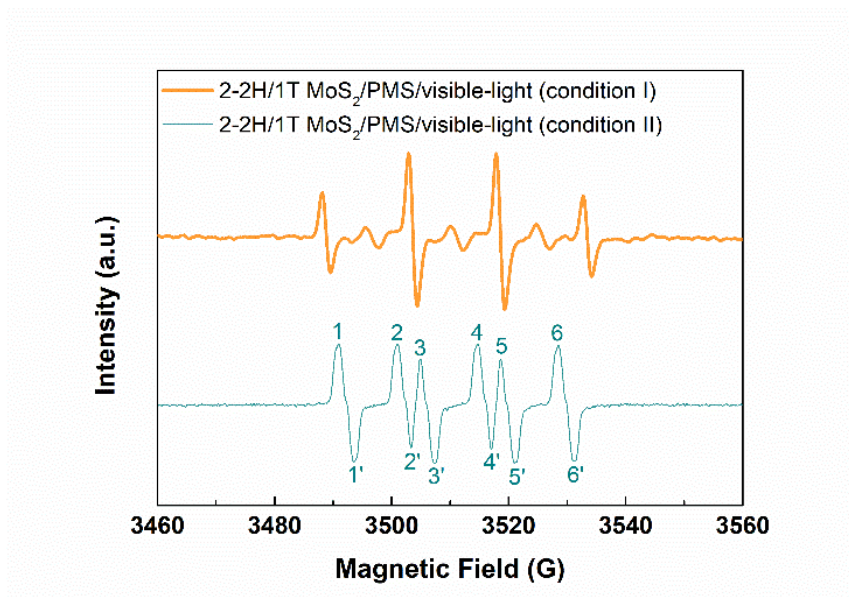

**Figure S9.** EPR spectra recorded in 2-2H/1T MoS<sub>2</sub>/PMS/visible-light system.

Condition I: [2,4-D]<sub>0</sub> = 25 μM; [PMS]<sub>0</sub> = 0.5 mM; MoS<sub>2</sub> dosage = 100 mg·L<sup>-1</sup>, initial pH = 5.0, Temperature = 20 °C

Condition II: [2,4-D]<sub>0</sub> = 25 μM; [PMS]<sub>0</sub> = 50 mM; MoS<sub>2</sub> dosage = 1000 mg·L<sup>-1</sup>, initial pH = 5.0, Temperature = 20 °C

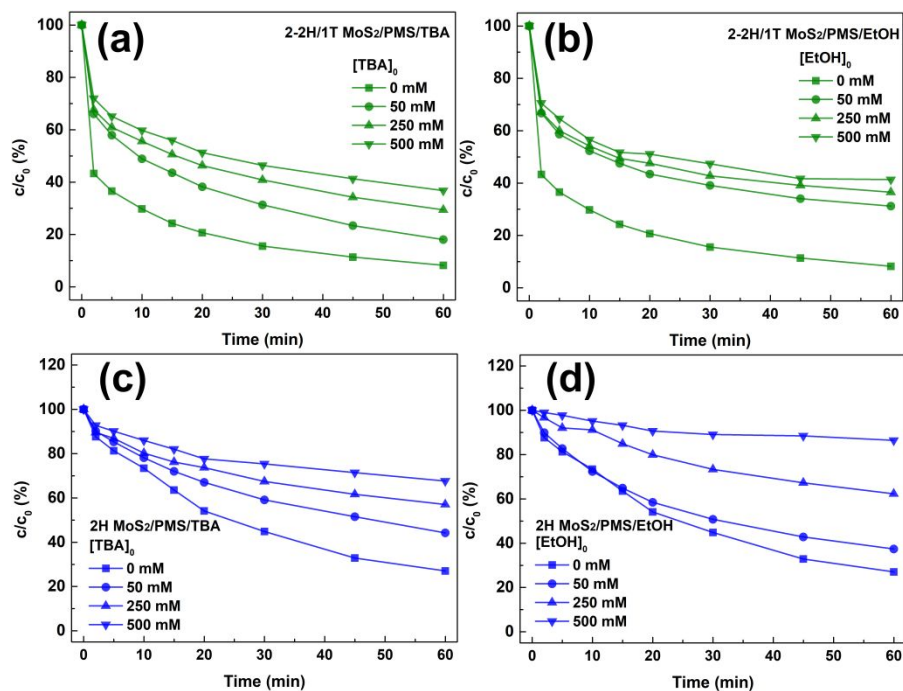

**Figure S10.** The 2,4-D degradations with radical scavengers in (a, b) 2-2H/1T MoS<sub>2</sub>/PMS, (c, d) 2H MoS<sub>2</sub>/PMS systems. Reaction conditions: [2,4-D]<sub>0</sub>= 25 μM; [PMS]<sub>0</sub>= 0.5 mM; MoS<sub>2</sub> dosage= 100 mg·L<sup>-1</sup>, initial pH= 5.0, Temperature= 20 °C.

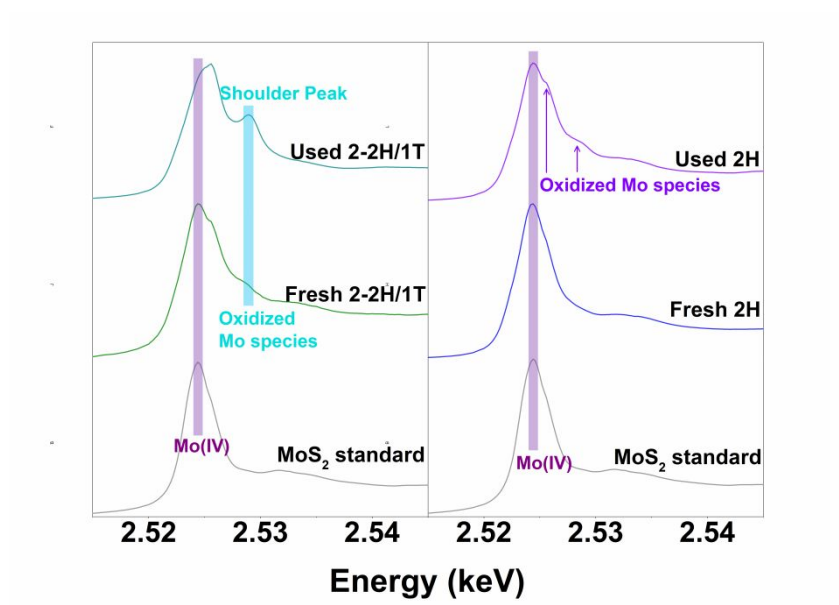

**Figure S11.** The Mo L<sub>3</sub>-edge XANES data for 2H or 2-2H/1T MoS<sub>2</sub> samples before and after photo-catalytic PMS reactions.

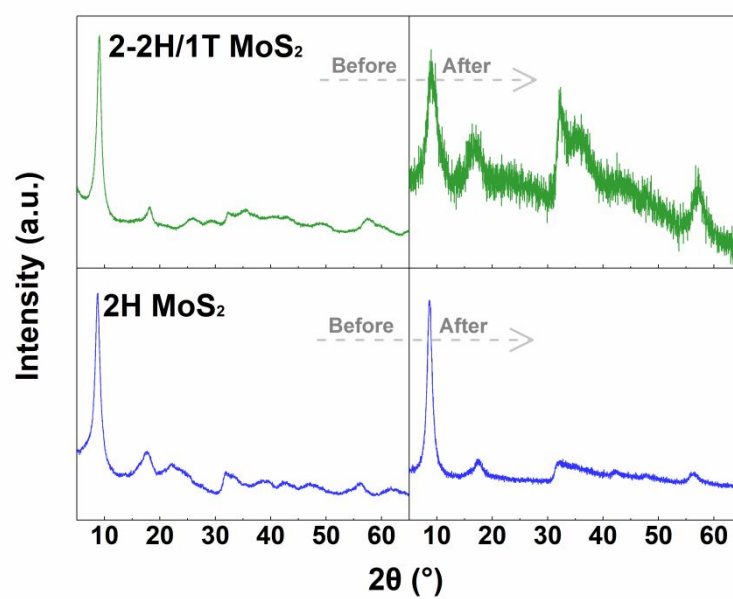

**Figure S12.** XRD patterns of 2-2H/1T MoS<sub>2</sub> and 2H MoS<sub>2</sub> after reactions.

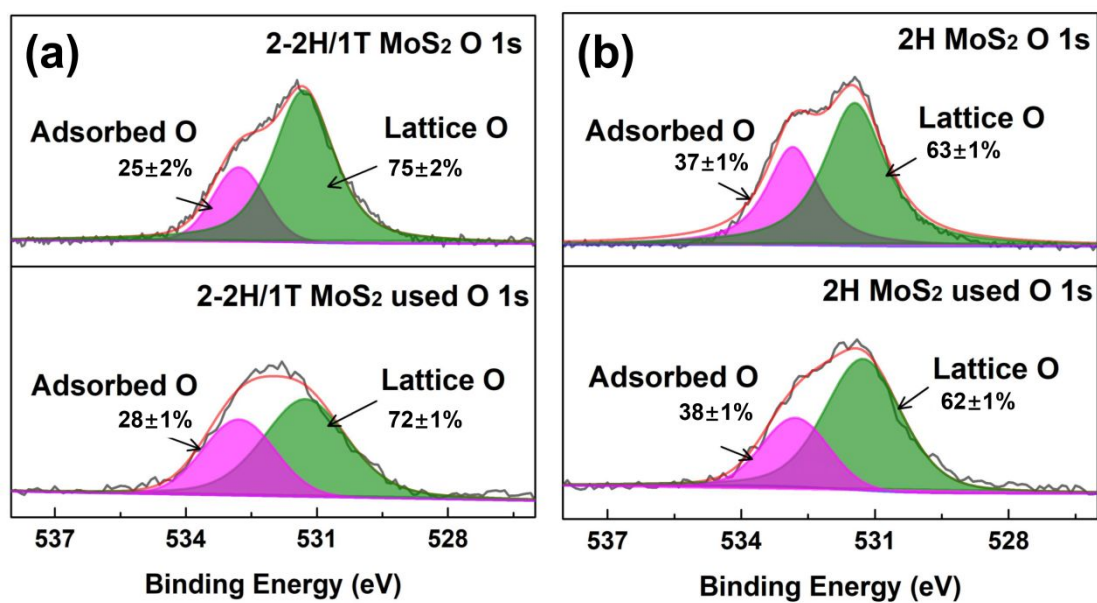

**Figure S13.** High-resolution XPS spectra of (a) O 1s for 2-2H/1T MoS<sub>2</sub> before and after 5 runs of reactions under visible-light irradiation, and (b) O 1s for 2H MoS<sub>2</sub> before and after 5 runs of reactions under visible-light irradiation.

**Table S1.** The phase distribution of various MoS<sub>2</sub> samples based on the deconvolution of Mo 3d

| Samples                  | Mo 3d <sub>3/2</sub> |         | Mo 3d <sub>5/2</sub> |         | Phase distribution |
|--------------------------|----------------------|---------|----------------------|---------|--------------------|
|                          | 2H area              | 1T area | 2H area              | 1T area |                    |
| 2H MoS <sub>2</sub>      | 7473                 | 0       | 9484                 | 0       | 13%±2% 1T          |
| 1-2H/1T MoS <sub>2</sub> | 11191                | 9545    | 15531                | 9312    | 40%±2% 1T          |
| 2-2H/1T MoS <sub>2</sub> | 5091                 | 7002    | 7570                 | 7185    | 50%±3% 1T          |
| 3-2H/1T MoS <sub>2</sub> | 3069                 | 7105    | 4023                 | 8392    | 70%±4% 1T          |
| 4-2H/1T MoS <sub>2</sub> | 942                  | 2950    | 855                  | 3717    | 80%±3% 1T          |



**Table S2.** Comparison of different catalysts for PMS activation in 2,4-D removal. ( $v$ -

$$\text{value} = \frac{1}{m_{\text{cat}}} \frac{dn}{dt} \text{ g})$$

| Catalyst<br>(dosage: g L <sup>-1</sup> )          | PMS dosage<br>(g L <sup>-1</sup> )  | Pollutants<br>(mg L <sup>-1</sup> ) | Removal<br>(%)    | $v$ -value*<br>( $\mu\text{mol s}^{-1} \text{ g}_{\text{cat}}^{-1}$ ) | Reference |
|---------------------------------------------------|-------------------------------------|-------------------------------------|-------------------|-----------------------------------------------------------------------|-----------|
| FeS (0.15)                                        | 0.3 (PS)                            | 2,4-D<br>(10 mg L <sup>-1</sup> )   | 100%<br>(120 min) | 0.042                                                                 | 1         |
| HNPs (0.5)                                        | 0.9                                 | 2,4-D<br>(5 mg L <sup>-1</sup> )    | 100%<br>(40 min)  | 0.019                                                                 | 2         |
| MCFNs (0.2)                                       | 0.6 (PMS)<br>+16 ppm O <sub>3</sub> | 2,4-D<br>(20 mg L <sup>-1</sup> )   | 100%<br>(60 min)  | 0.125                                                                 | 3         |
| ZVI<br>(0.4)                                      | Pure O <sub>2</sub><br>bubbling     | 2,4-D<br>(221 mg L <sup>-1</sup> )  | 100%<br>(150 min) | 0.006                                                                 | 4         |
| Benchmark<br>Fe <sub>2</sub> O <sub>3</sub> (0.1) | 0.15                                | 2,4-D<br>(5.5 mg L <sup>-1</sup> )  | 25%<br>(60 min)   | 0.018                                                                 | Benchmark |
| Benchmark<br>Fe <sub>3</sub> O <sub>4</sub> (0.1) | 0.15                                | 2,4-D<br>(5.5 mg L <sup>-1</sup> )  | 6%<br>(60 min)    | 0.004                                                                 | Benchmark |
| Benchmark<br>Co <sub>3</sub> O <sub>4</sub> (0.1) | 0.15                                | 2,4-D<br>(5.5 mg L <sup>-1</sup> )  | 49%<br>(60 min)   | 0.036                                                                 | Benchmark |
| 4-2H/1T MoS <sub>2</sub><br>(0.1)                 | 0.15                                | 2,4-D<br>(5.5 mg L <sup>-1</sup> )  | 96%<br>(60 min)   | 0.070                                                                 | This work |

\* $v$ -value =  $\frac{1}{m_{\text{cat}}} \frac{dn}{dt}$ , here  $m_{\text{cat}}$  represents for the mass of catalyst (g),  $n$  is  $\mu\text{mol}$  of 2,4-D removal

and  $t$  is reaction time (s).<sup>5</sup>

**Table S3.** The corresponding fitting parameters of  $-\ln(c/c_0)$  vs  $t$  of various MoS<sub>2</sub>/PMS system.

| Samples                             | Fitting Parameters of $-\ln(c/c_0)$ versus $t$ of various MoS <sub>2</sub> |           |       |
|-------------------------------------|----------------------------------------------------------------------------|-----------|-------|
|                                     | Slope*                                                                     | Intercept | $R^2$ |
| 2H MoS <sub>2</sub><br>(Dark)       | 0.0169                                                                     | 0.1738    | 0.99  |
| 2H MoS <sub>2</sub><br>(Light)      | 0.0303                                                                     | 0.3339    | 0.97  |
| 2-2H/1T MoS <sub>2</sub><br>(Dark)  | 0.0212                                                                     | 0.5551    | 0.99  |
| 2-2H/1T MoS <sub>2</sub><br>(Light) | 0.0621                                                                     | 0.1978    | 0.99  |

\*The second stage (10~60 min) was chosen to investigate reaction rate.

## Supporting Information Reference

1. Chen, H.; Zhang, Z.; Feng, M.; Liu, W.; Wang, W.; Yang, Q.; Hu, Y., Degradation of 2,4-Dichlorophenoxyacetic Acid in Water by Persulfate Activated with FeS (Mackinawite). *Chem. Eng.J.* **2017**, *313*, 498-507.
2. Jaafarzadeh, N.; Ghanbari, F.; Ahmadi, M., Catalytic Degradation of 2,4-Dichlorophenoxyacetic acid (2,4-D) by Nano-Fe<sub>2</sub>O<sub>3</sub> Activated Peroxymonosulfate: Influential Factors and Mechanism Determination. *Chemosphere* **2017**, *169*, 568-576.
3. Jaafarzadeh, N.; Ghanbari, F.; Ahmadi, M., Efficient Degradation of 2,4-Dichlorophenoxyacetic Acid by Peroxymonosulfate/Magnetic Copper Ferrite Nanoparticles/Ozone: A Novel Combination of Advanced Oxidation Processes. *Chem. Eng.J.* **2017**, *320*, 436-447.
4. Correia de Velosa, A.; Pupo Nogueira, R. F., 2,4-Dichlorophenoxyacetic acid (2,4-D) Degradation Promoted by Nanoparticulate Zerovalent Iron (nZVI) in Aerobic Suspensions. *J. Environ. Manage.* **2013**, *121*, 72-79.
5. Yang, D.; Feng, J.; Jiang, L.; Wu, X.; Sheng, L.; Jiang, Y.; Wei, T.; Fan, Z., Photocatalyst Interface Engineering: Spatially Confined Growth of ZnFe<sub>2</sub>O<sub>4</sub> within Graphene Networks as Excellent Visible-Light-Driven Photocatalysts. *Adv. Funct. Mater.* **2015**, *25*, 7080-7087.
